# Supplementary material for: QTL Mapping for Fiber Quality and Yield Traits Based on Introgression Lines Derived from Gossypium hirsutum × G. tomentosum
Source: PubMed Central journal article supplement (PMC5796191; doi:10.3390/ijms19010243), 2018-01-14
Supplement: ijms-19-00243-s001.pdf [file ijms-19-00243-s001.pdf]

# Supplementary Materials: QTL mapping for fiber quality and yield traits based on introgression lines derived from *Gossypium hirsutum* × *G. tomentosum*

Ayaz Ali Keerio, Chao Shen, Yichun Nie, Muhammad Mahmood Ahmed, Xianlong Zhang and Zhongxu Lin

Table S1. Correlation coefficient among fiber quality and yield traits.

| Traits | MIC      | FL       | FU       | FS       | FE       | BW       | LW       | LP       | HSW     | PH      | BN       | FBN      |
|--------|----------|----------|----------|----------|----------|----------|----------|----------|---------|---------|----------|----------|
| FL     | -0.41 ** | -        | -        | -        | -        | -        | -        | -        | -       | -       | -        | -        |
| FU     | -0.04 NS | 0.50 **  | -        | -        | -        | -        | -        | -        | -       | -       | -        | -        |
| FS     | 0.01 NS  | 0.58 **  | 0.62 **  | -        | -        | -        | -        | -        | -       | -       | -        | -        |
| FE     | -0.01 NS | -0.09 NS | 0.04 NS  | 0.14 NS  | -        | -        | -        | -        | -       | -       | -        | -        |
| BW     | -0.06 NS | 0.02 NS  | -0.02 NS | -0.07 NS | -0.21 *  | -        | -        | -        | -       | -       | -        | -        |
| LW     | 0.16 NS  | -0.17 NS | -0.07 NS | -0.16 NS | -0.15 NS | 0.83 **  | -        | -        | -       | -       | -        | -        |
| LP     | 0.40 **  | -0.35 *  | -0.10 NS | -0.21 *  | 0.01 NS  | 0.08 NS  | 0.61 **  | -        | -       | -       | -        | -        |
| HSW    | 0.06 NS  | -0.14 NS | 0.01 NS  | 0.01 NS  | -0.07 NS | 0.20 *   | 0.25 *   | 0.07 NS  | -       | -       | -        | -        |
| PH     | 0.06 NS  | -0.07 NS | 0.03 NS  | -0.05 NS | -0.02 NS | 0.05 NS  | 0.10 NS  | 0.11 NS  | 0.23 *  | -       | -        | -        |
| BN     | 0.12 NS  | 0.09 NS  | 0.13 NS  | 0.02 NS  | 0.01 NS  | -0.21 NS | -0.10 NS | 0.07 NS  | 0.03 NS | 0.28 *  | -        | -        |
| FBN    | 0.05 NS  | 0.09 NS  | 0.03 NS  | 0.04 NS  | -0.04 NS | -0.10 NS | -0.13 NS | -0.09 NS | 0.07 NS | 0.29 *  | 0.18 NS  | -        |
| SI     | -0.17 NS | 0.07 NS  | 0.09 NS  | -0.04 NS | -0.04 NS | 0.26 *   | 0.16 NS  | -0.10 NS | 0.41 ** | 0.09 NS | -0.02 NS | -0.04 NS |

\*\* = Significant at  $p < 0.01$ ; \* = Significant at  $p < 0.05$ ; NS = Non-significant.

**Table S2.** Basic characteristics of SLAF library construction.

| Samples                  | Total Reads | Q30 Percentage (%) | GC Percentage (%) |
|--------------------------|-------------|--------------------|-------------------|
| 4105 (Background parent) | 19,796,308  | 91.87              | 41.31             |
| <i>G. tomentosum</i>     | 9,273,354   | 91.1               | 40.12             |
| ILs                      | 2,206,821   | 90                 | 37                |
| Average                  | -           | 91                 | 40                |

Data shown for ILs are average of all the lines.

**Table S3.** Distribution of SLAF number and sequencing depth in parents and ILs.

| Samples                  | SLAF Numbers | Total Depth | Average Depth |
|--------------------------|--------------|-------------|---------------|
| 4105 (Background parent) | 595,419      | 17,700,686  | 29.73         |
| <i>G. tomentosum</i>     | 359,255      | 7,587,937   | 21.12         |
| ILs                      | 258,697      | 2,030,437   | 8             |

Data shown for ILs are average of all the lines.

**Table S4.** Statistics on the number of SNP for each ILs

| ILs | SNP Number | Heter-Loci Number | Homo-Loci Number | Heter-loci Ratio | Homo-loci Ratio |
|-----|------------|-------------------|------------------|------------------|-----------------|
| 1   | 14,647     | 582               | 14,065           | 3.97%            | 96.03%          |
| 2   | 14,583     | 900               | 13,683           | 6.17%            | 93.83%          |
| 3   | 15,006     | 707               | 14,299           | 4.71%            | 95.29%          |
| 4   | 13,989     | 632               | 13,357           | 4.51%            | 95.48%          |
| 5   | 14,297     | 1334              | 12,963           | 9.33%            | 90.67%          |
| 6   | 15,067     | 630               | 14,437           | 4.18%            | 95.82%          |
| 7   | 15,027     | 5698              | 93,29            | 37.91%           | 62.08%          |
| 8   | 13,998     | 1961              | 12,037           | 14.00%           | 85.99%          |
| 9   | 14,662     | 739               | 13,923           | 5.04%            | 94.96%          |
| 10  | 15,420     | 731               | 14,689           | 4.74%            | 95.26%          |
| 11  | 14,981     | 1064              | 13,917           | 7.10%            | 92.90%          |
| 12  | 15,063     | 1042              | 14,021           | 6.91%            | 93.08%          |
| 13  | 14,518     | 671               | 13,847           | 4.62%            | 95.38%          |
| 14  | 14,968     | 1036              | 13,932           | 6.92%            | 93.08%          |
| 15  | 14,487     | 675               | 13,812           | 4.65%            | 95.34%          |
| 16  | 14,392     | 978               | 13,414           | 6.79%            | 93.20%          |
| 17  | 14,564     | 972               | 13,592           | 6.67%            | 93.33%          |
| 18  | 13,890     | 795               | 13,095           | 5.72%            | 94.28%          |
| 19  | 15,722     | 2182              | 13,540           | 13.87%           | 86.12%          |
| 20  | 15,349     | 653               | 14,696           | 4.25%            | 95.75%          |
| 21  | 15,503     | 952               | 14,551           | 6.14%            | 93.86%          |
| 22  | 14,953     | 2438              | 12,515           | 16.30%           | 83.70%          |
| 23  | 15,199     | 760               | 14,439           | 5.00%            | 95.00%          |
| 24  | 15,361     | 1060              | 14,301           | 6.90%            | 93.10%          |
| 25  | 14,236     | 746               | 13,490           | 5.24%            | 94.76%          |
| 26  | 15,422     | 689               | 14,733           | 4.46%            | 95.53%          |
| 27  | 14,949     | 717               | 14,232           | 4.79%            | 95.20%          |
| 28  | 15,393     | 647               | 14,746           | 4.20%            | 95.80%          |

|    |        |      |        |        |        |
|----|--------|------|--------|--------|--------|
| 29 | 15,393 | 773  | 14,620 | 5.02%  | 94.98% |
| 30 | 15,412 | 1084 | 14,328 | 7.03%  | 92.97% |
| 31 | 15,777 | 879  | 14,898 | 5.57%  | 94.43% |
| 32 | 14,964 | 1242 | 13,722 | 8.29%  | 91.70% |
| 33 | 15,352 | 687  | 14,665 | 4.47%  | 95.53% |
| 34 | 14,532 | 702  | 13,830 | 4.83%  | 95.17% |
| 35 | 15,259 | 891  | 14,368 | 5.83%  | 94.16% |
| 36 | 15,059 | 924  | 14,135 | 6.13%  | 93.86% |
| 37 | 15,522 | 827  | 14,695 | 5.32%  | 94.67% |
| 38 | 15,545 | 1200 | 14,345 | 7.71%  | 92.28% |
| 39 | 13,650 | 482  | 13,168 | 3.53%  | 96.47% |
| 40 | 14,618 | 767  | 13,851 | 5.24%  | 94.75% |
| 41 | 14,338 | 584  | 13,754 | 4.07%  | 95.93% |
| 42 | 14,962 | 661  | 14,301 | 4.41%  | 95.58% |
| 43 | 15,520 | 691  | 14,829 | 4.45%  | 95.55% |
| 44 | 15,188 | 696  | 14,492 | 4.58%  | 95.42% |
| 45 | 13,641 | 584  | 13,057 | 4.28%  | 95.72% |
| 46 | 14,902 | 792  | 14,110 | 5.31%  | 94.69% |
| 47 | 13,609 | 538  | 13,071 | 3.95%  | 96.05% |
| 48 | 15,658 | 1082 | 14,576 | 6.91%  | 93.09% |
| 49 | 14,648 | 1117 | 13,531 | 7.62%  | 92.37% |
| 50 | 14,320 | 701  | 13,619 | 4.89%  | 95.10% |
| 51 | 15,391 | 1366 | 14,025 | 8.87%  | 91.12% |
| 52 | 15,902 | 954  | 14,948 | 5.99%  | 94.00% |
| 53 | 15,404 | 743  | 14,661 | 4.82%  | 95.18% |
| 54 | 15,621 | 5141 | 10,480 | 32.91% | 67.09% |
| 55 | 15,465 | 723  | 14,742 | 4.67%  | 95.32% |
| 56 | 15,531 | 3619 | 11,912 | 23.30% | 76.70% |
| 57 | 15,665 | 1817 | 13,848 | 11.59% | 88.40% |
| 58 | 15,509 | 1044 | 14,465 | 6.73%  | 93.27% |
| 59 | 13,268 | 546  | 12,722 | 4.11%  | 95.88% |
| 60 | 12,905 | 523  | 12,382 | 4.05%  | 95.95% |
| 61 | 14,973 | 642  | 14,331 | 4.28%  | 95.71% |
| 62 | 15,658 | 1389 | 14,269 | 8.87%  | 91.13% |
| 63 | 15,625 | 2662 | 12,963 | 17.03% | 82.96% |
| 64 | 12,944 | 766  | 12,178 | 5.91%  | 94.08% |
| 65 | 15,235 | 779  | 14,456 | 5.11%  | 94.89% |
| 66 | 15,612 | 1094 | 14,518 | 7.00%  | 92.99% |
| 67 | 15,079 | 752  | 14,327 | 4.98%  | 95.01% |
| 68 | 15,502 | 735  | 14,767 | 4.74%  | 95.26% |
| 69 | 15,108 | 1052 | 14,056 | 6.96%  | 93.04% |
| 70 | 15,704 | 1459 | 14,245 | 9.29%  | 90.71% |
| 71 | 15,534 | 896  | 14,638 | 5.76%  | 94.23% |
| 72 | 15,723 | 1155 | 14,568 | 7.34%  | 92.65% |
| 73 | 15,755 | 823  | 14,932 | 5.22%  | 94.78% |
| 74 | 15,738 | 797  | 14,941 | 5.06%  | 94.94% |
| 75 | 15,752 | 907  | 14,845 | 5.75%  | 94.24% |
| 76 | 15,277 | 825  | 14,452 | 5.40%  | 94.60% |

|     |        |      |        |        |        |
|-----|--------|------|--------|--------|--------|
| 77  | 15,375 | 1435 | 13,940 | 9.33%  | 90.67% |
| 78  | 15,352 | 707  | 14,645 | 4.60%  | 95.39% |
| 79  | 15,602 | 873  | 14,729 | 5.59%  | 94.40% |
| 80  | 14,833 | 710  | 14,123 | 4.78%  | 95.21% |
| 81  | 14,377 | 700  | 13,677 | 4.86%  | 95.13% |
| 82  | 14,649 | 790  | 13,859 | 5.39%  | 94.61% |
| 83  | 15,332 | 922  | 14,410 | 6.01%  | 93.99% |
| 84  | 14,730 | 963  | 13,767 | 6.53%  | 93.46% |
| 85  | 15,148 | 650  | 14,498 | 4.29%  | 95.71% |
| 86  | 14,970 | 1054 | 13,916 | 7.04%  | 92.96% |
| 87  | 15,029 | 843  | 14,186 | 5.60%  | 94.39% |
| 88  | 13,929 | 604  | 13,325 | 4.33%  | 95.66% |
| 89  | 14,345 | 1040 | 13,305 | 7.24%  | 92.75% |
| 90  | 14,942 | 1974 | 12,968 | 13.21% | 86.79% |
| 91  | 14,151 | 4709 | 9442   | 33.27% | 66.72% |
| 92  | 14,305 | 666  | 13,639 | 4.65%  | 95.34% |
| 93  | 14,032 | 804  | 13,228 | 5.72%  | 94.27% |
| 94  | 14,785 | 844  | 13,941 | 5.70%  | 94.29% |
| 95  | 15,155 | 747  | 14,408 | 4.92%  | 95.07% |
| 96  | 15,005 | 712  | 14,293 | 4.74%  | 95.25% |
| 97  | 14,909 | 1190 | 13,719 | 7.98%  | 92.02% |
| 98  | 15,330 | 2794 | 12,536 | 18.22% | 81.77% |
| 99  | 15,132 | 754  | 14,378 | 4.98%  | 95.02% |
| 100 | 15,144 | 1103 | 14,041 | 7.28%  | 92.72% |
| 101 | 15,173 | 2470 | 12,703 | 16.27% | 83.72% |
| 102 | 15,064 | 778  | 14,286 | 5.16%  | 94.84% |
| 103 | 14,376 | 671  | 13,705 | 4.66%  | 95.33% |
| 104 | 15,221 | 703  | 14,518 | 4.61%  | 95.38% |
| 105 | 14,256 | 809  | 13,447 | 5.67%  | 94.33% |
| 106 | 15,350 | 837  | 14,513 | 5.45%  | 94.55% |
| 107 | 14,578 | 738  | 13,840 | 5.06%  | 94.94% |

---

**Table S5.** Analysis of QTLs for fiber quality and yield traits in three environments.

| QTL                     | Marker      | Chr.          | Position (Mb) | Env.     | LOD          | PVE (%)      | Add          |
|-------------------------|-------------|---------------|---------------|----------|--------------|--------------|--------------|
| <i>qMIC-A05-1</i>       | M549        | ChrA05        | 26.89         | 1        | 3.02         | 8.92         | -0.36        |
| <i>qMIC-D03-1</i>       | M2107       | ChrD03        | 25.57         | 1        | 4.45         | 13.57        | -0.32        |
| <i>qMIC-A06-1</i>       | M593        | ChrA06        | 69.49         | 2        | 3.35         | 10.04        | 0.25         |
| <i>qMIC-D011-1</i>      | M3071       | ChrD11        | 65.79         | 2        | 34.00        | 12.17        | 0.43         |
| <i>qFL-A03-1</i>        | M450        | ChrA03        | 16.10         | 3        | 6.45         | 6.31         | 0.84         |
| <i>qFL-A10-1</i>        | M1096       | ChrA10        | 93.40         | 3        | 7.57         | 7.59         | 0.74         |
| <i>qFL-A12-1</i>        | M1189       | ChrA12        | 66.13         | 3        | 12.87        | 14.59        | 0.63         |
| <i>qFL-A12-2</i>        | M1205       | ChrA12        | 10.69         | 3        | 7.07         | 7.01         | -0.99        |
| <i>qFL-A13-1</i>        | M1395       | ChrA13        | 36.84         | 3        | 11.55        | 12.69        | -1.20        |
| <i>qFL-D05-1</i>        | M2255       | ChrD05        | 51.36         | 3        | 7.08         | 7.01         | -0.48        |
| <i>qFL-D06-1</i>        | M2285       | ChrD06        | 17.70         | 3        | 3.02         | 2.73         | 0.25         |
| <i>qFL-D06-2</i>        | M2552       | ChrD06        | 50.30         | 3        | 5.81         | 5.59         | -0.64        |
| <i>qFL-D10-1</i>        | M2978       | ChrD10        | 12.29         | 3        | 4.58         | 4.30         | -0.40        |
| <i>qFL-D10-2</i>        | M3030       | ChrD10        | 61.85         | 3        | 7.49         | 7.50         | -10.02       |
| <i>qFU-A06-1</i>        | M629        | ChrA06        | 17.68         | 3        | 4.60         | 17.94        | -1.22        |
| <i>qFS-D02-1</i>        | M1897       | ChrD02        | 18.22         | 1        | 3.99         | 15.76        | 1.88         |
| <i>qFS-A01-1</i>        | M82         | ChrA01        | 77.65         | 2        | 3.06         | 8.45         | -0.96        |
| <i>qFS-A01-2</i>        | M253        | ChrA01        | 85.41         | 2        | 4.43         | 12.64        | 1.81         |
| <b><i>qFS-A09-1</i></b> | <b>M993</b> | <b>ChrA09</b> | <b>46.41</b>  | <b>2</b> | <b>7.08</b>  | <b>21.61</b> | <b>1.59</b>  |
| <i>qFS-A01-3</i>        | M28         | ChrA01        | 20.44         | 3        | 3.12         | 9.15         | -1.17        |
| <b><i>qFS-A09-2</i></b> | <b>M993</b> | <b>ChrA09</b> | <b>46.41</b>  | <b>3</b> | <b>4.54</b>  | <b>13.75</b> | <b>0.97</b>  |
| <i>qFE-A08-1</i>        | M2821       | ChrD08        | 45.58         | 1        | 3.51         | 10.00        | 0.52         |
| <i>qFE-A11-1</i>        | M1140       | ChrA11        | 18.47         | 2        | 4.91         | 15.12        | 0.90         |
| <i>qFE-A12-1</i>        | M1204       | ChrA12        | 10.27         | 2        | 3.16         | 9.32         | 0.71         |
| <i>qFE-D06-1</i>        | M2339       | ChrD06        | 28.90         | 2        | 4.57         | 13.94        | 0.67         |
| <i>qFE-A02-1</i>        | M345        | ChrA02        | 12.27         | 3        | 5.16         | 9.92         | 0.30         |
| <i>qFE-A13-1</i>        | M1309       | ChrA13        | 13.99         | 3        | 4.64         | 8.81         | -0.23        |
| <i>qFE-D02-1</i>        | M1978       | ChrD02        | 22.44         | 3        | 6.63         | 13.17        | 0.24         |
| <i>qFE-D02-2</i>        | M2057       | ChrD02        | 56.73         | 3        | 4.62         | 8.78         | 0.44         |
| <i>qFE-D07-1</i>        | M2816       | ChrD07        | 44.50         | 3        | 4.74         | 9.02         | 0.29         |
| <i>qBW-D04-1</i>        | M2170       | ChrD04        | 40.54         | 1        | 3.05         | 13.33        | 0.20         |
| <i>qBW-A07-1</i>        | M749        | ChrA07        | 68.67         | 2        | 6.83         | 19.53        | -0.62        |
| <i>qBW-A09-1</i>        | M900        | ChrA09        | 45.81         | 2        | 3.23         | 8.44         | 0.16         |
| <i>qBW-A09-2</i>        | M1027       | ChrA09        | 66.34         | 2        | 24.26        | 11.42        | 0.41         |
| <i>qBW-D10-1</i>        | M3016       | ChrD10        | 56.48         | 2        | 3.17         | 8.25         | -0.32        |
| <i>qBW-A03-1</i>        | M436        | ChrA03        | 15.68         | 3        | 3.90         | 10.97        | -0.26        |
| <i>qBW-A13-1</i>        | M1458       | ChrA13        | 40.74         | 3        | 4.17         | 11.83        | -0.33        |
| <i>qLW-A07-1</i>        | M749        | ChrA07        | 68.67         | 2        | 3.43         | 10.46        | -0.22        |
| <i>qLW-D10-1</i>        | M3016       | ChrD10        | 56.48         | 2        | 5.15         | 16.41        | -0.21        |
| <i>qLW-A05-1</i>        | M561        | ChrA05        | 35.06         | 3        | 4.24         | 15.97        | -0.43        |
| <b><i>qLP-A07-1</i></b> | <b>M691</b> | <b>ChrA07</b> | <b>10.97</b>  | <b>1</b> | <b>7.71</b>  | <b>25.95</b> | <b>-6.36</b> |
| <i>qLP-A01-1</i>        | M77         | ChrA01        | 77.52         | 3        | 7.19         | 4.25         | -0.78        |
| <i>qLP-A01-2</i>        | M227        | ChrA01        | 84.35         | 3        | 8.53         | 5.20         | 1.60         |
| <i>qLP-A05-1</i>        | M561        | ChrA05        | 35.06         | 3        | 29.58        | 30.15        | -10.53       |
| <b><i>qLP-A07-2</i></b> | <b>M695</b> | <b>ChrA07</b> | <b>11.15</b>  | <b>3</b> | <b>10.98</b> | <b>7.08</b>  | <b>5.10</b>  |

|                   |       |        |       |   |       |       |       |
|-------------------|-------|--------|-------|---|-------|-------|-------|
| <i>qLP-A11-1</i>  | M1133 | ChrA11 | 15.17 | 3 | 12.61 | 8.44  | 5.57  |
| <i>qLP-A11-2</i>  | M1158 | ChrA11 | 19.11 | 3 | 7.05  | 4.15  | -1.98 |
| <i>qLP-A12-1</i>  | M1273 | ChrA12 | 77.44 | 3 | 3.70  | 2.02  | 1.24  |
| <i>qLP-A13-1</i>  | M1575 | ChrA13 | 48.09 | 3 | 5.19  | 2.93  | 2.33  |
| <i>qLP-A13-2</i>  | M1800 | ChrA13 | 70.58 | 3 | 8.23  | 4.98  | -3.04 |
| <i>qLP-D02-1</i>  | M1955 | ChrD02 | 20.99 | 3 | 6.16  | 3.56  | 0.71  |
| <i>qLP-D05-1</i>  | M2216 | ChrD05 | 20.31 | 3 | 5.69  | 3.26  | 1.20  |
| <i>qLP-D06-1</i>  | M2580 | ChrD06 | 51.28 | 3 | 11.92 | 7.85  | -2.25 |
| <i>qHSW-A02-1</i> | M357  | ChrA02 | 40.7  | 2 | 10.74 | 11.42 | 1.08  |
| <i>qHSW-A03-1</i> | M421  | ChrA03 | 45.13 | 2 | 7.48  | 7.38  | 0.63  |
| <i>qHSW-A06-1</i> | M670  | ChrA06 | 10.18 | 2 | 4.90  | 4.56  | 0.79  |
| <i>qHSW-A09-1</i> | M934  | ChrA09 | 93.82 | 2 | 8.29  | 8.33  | 1.30  |
| <i>qHSW-A13-1</i> | M1567 | ChrA13 | 47.99 | 2 | 3.15  | 2.82  | -0.75 |
| <i>qHSW-A13-2</i> | M1686 | ChrA13 | 54.02 | 2 | 15.09 | 17.77 | 1.04  |
| <i>qHSW-A13-3</i> | M1721 | ChrA13 | 58.85 | 2 | 4.83  | 4.49  | 0.68  |
| <i>qHSW-D02-1</i> | M2014 | ChrD02 | 37.78 | 2 | 5.14  | 4.82  | -0.48 |
| <i>qHSW-D06-1</i> | M2286 | ChrD06 | 17.7  | 2 | 3.33  | 3.00  | -0.22 |
| <i>qHSW-D06-2</i> | M2461 | ChrD06 | 38.2  | 2 | 8.86  | 9.02  | 0.47  |
| <i>qHSW-D07-1</i> | M2793 | ChrD07 | 31.31 | 2 | 4.04  | 3.69  | 0.62  |
| <i>qPH-D06-1</i>  | M2529 | ChrD06 | 46.57 | 1 | 3.28  | 11.44 | -5.52 |
| <i>qPH-D11-1</i>  | M3045 | ChrD11 | 53.39 | 1 | 4.47  | 16.08 | 9.09  |
| <i>qPH-A13-1</i>  | M1620 | ChrA13 | 49.16 | 2 | 3.13  | 10.93 | 7.35  |
| <i>qBN-A1-1</i>   | M305  | ChrA01 | 86.96 | 1 | 3.26  | 14.76 | 8.55  |
| <i>qBN-A13-1</i>  | M1483 | ChrA13 | 41.87 | 2 | 3.32  | 7.74  | -7.02 |
| <i>qBN-A13-2</i>  | M1792 | ChrA13 | 68.22 | 2 | 3.45  | 8.05  | 11.17 |
| <i>qBN-D02-1</i>  | M2034 | ChrD02 | 44.45 | 2 | 6.27  | 15.61 | 9.98  |
| <i>qFBN-D02-1</i> | M1926 | ChrD02 | 19.37 | 3 | 3.02  | 13.07 | 1.06  |
| <i>qSI-A02-1</i>  | M357  | ChrA02 | 40.7  | 3 | 3.62  | 10.03 | 0.66  |
| <i>qSI-A13-1</i>  | M1686 | ChrA13 | 54.02 | 3 | 6.17  | 18.10 | 0.68  |

MIC = micronaire, FL = fiber length, FU = fiber uniformity, FS = fiber strength, FE = fiber elongation, BW = boll weight, LW = lint weight, LP = lint percentage, HSW = hundred seed weight, PH = plant height, BN = boll number, FBN = fruiting branches number, SI = seed index, Chr. = Chromosome, Env. = Environment, LOD = Logarithm of odds, PVE = phenotypic variance explained, Add. Additive effects. The QTLs are highlighted as bold are stable QTLs.

**A**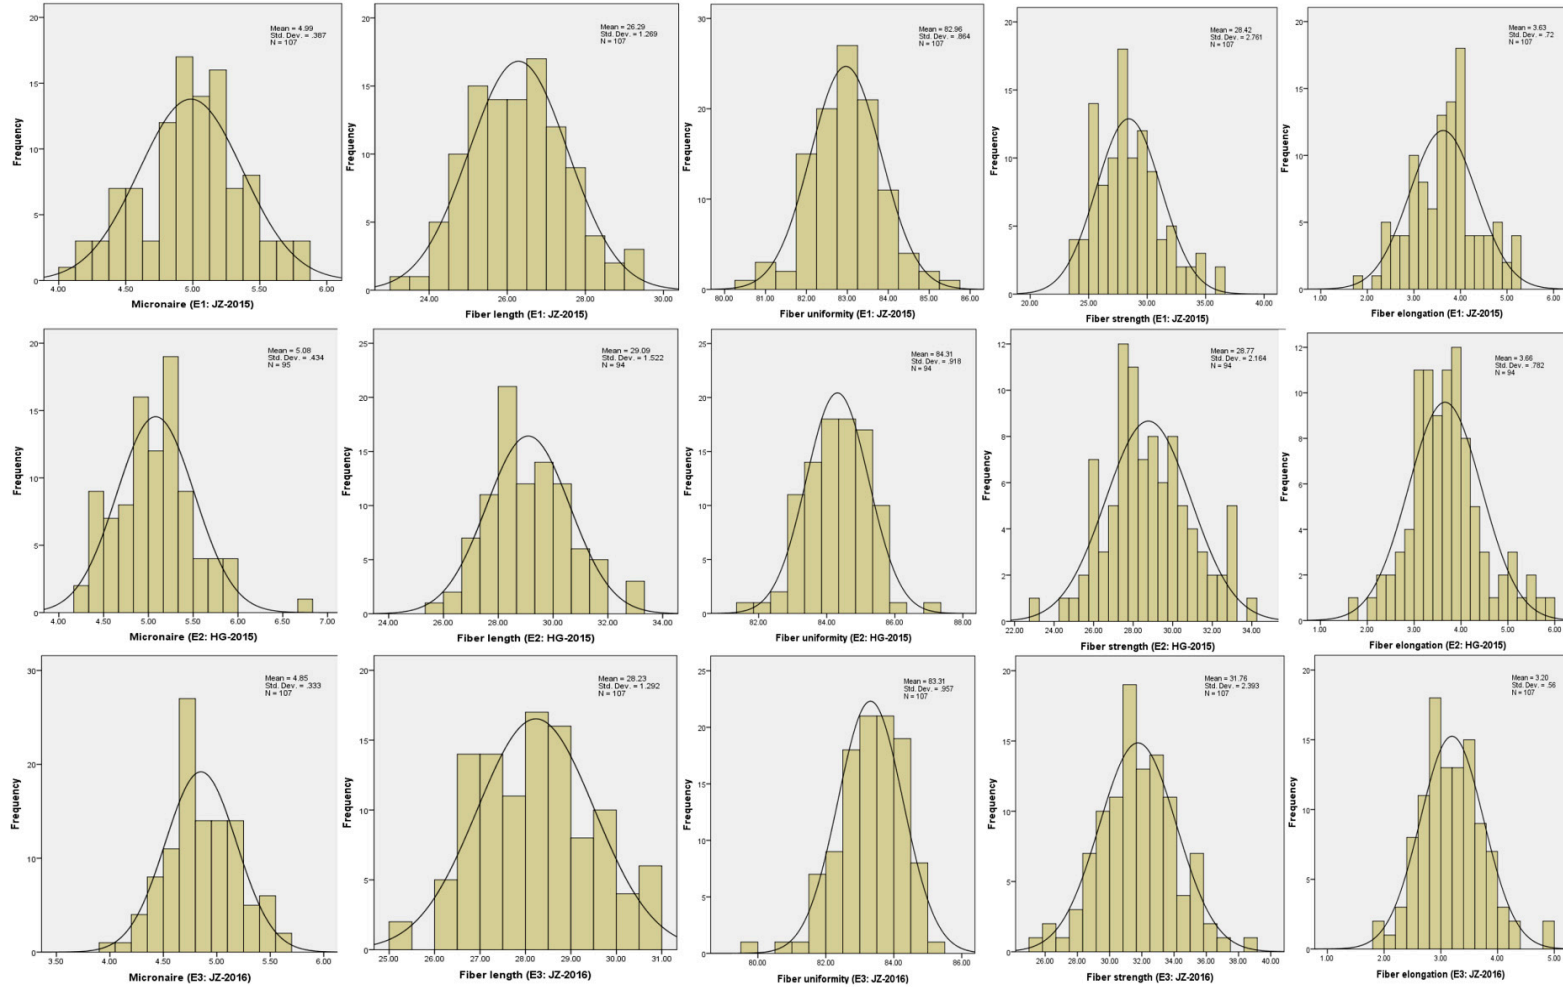

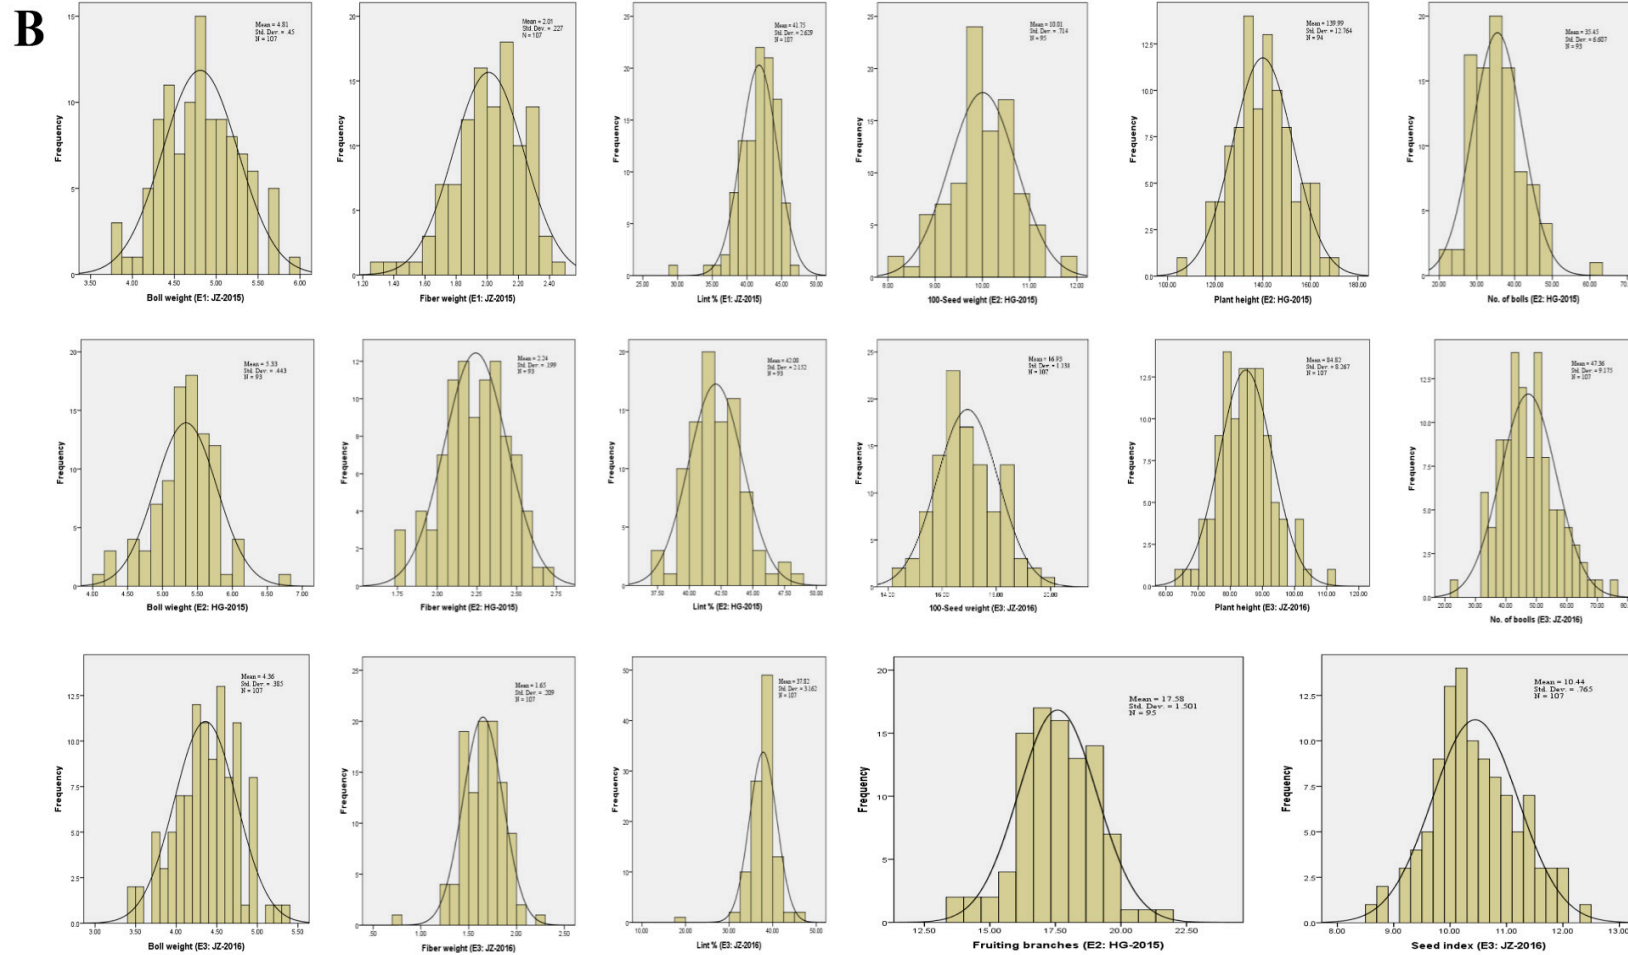

**Figure S1.** Phenotypic distribution of (A) five fiber quality traits and (B) eight yield traits in the ILs across three environments.



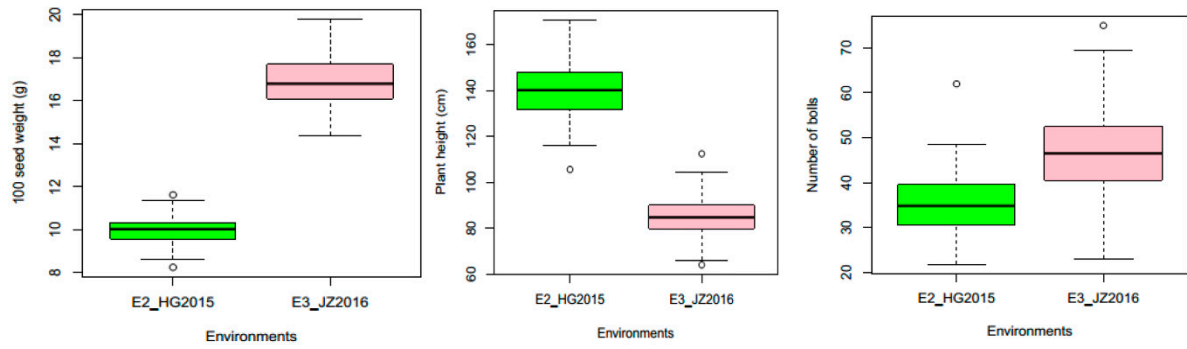

**Figure S2.** Box plot of the changing trends of three yield traits in two environments (FBN and SI only in E3 were not analyzed).

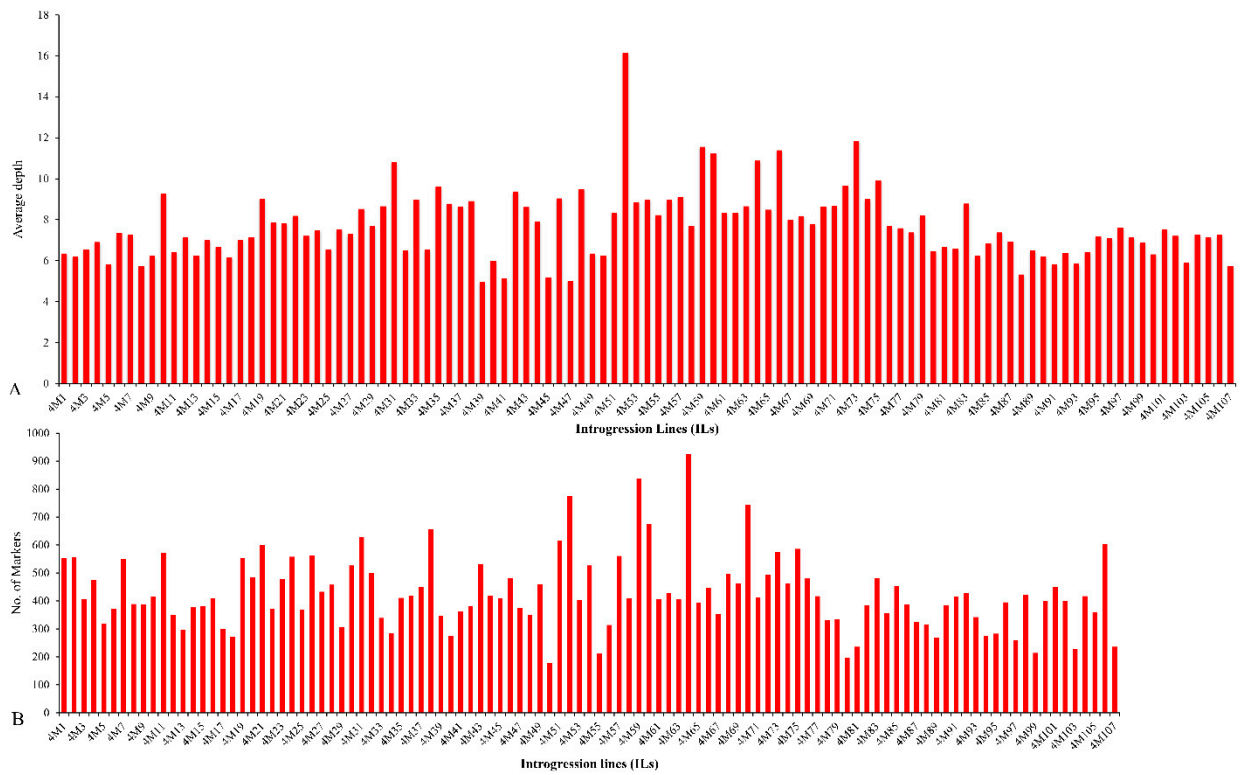

**Figure S3.** The x-axes in (A) and (B) indicate introgression lines, and the y-axes indicate the average sequencing depth (a) and number of markers (b).
